# Supplementary material for: Identification and Characterization of Human Monoclonal Antibodies for Immunoprophylaxis against Enterotoxigenic Escherichia coli Infection
Source: PubMed Central journal article supplement (PMC6056861; doi:10.1128/iai.00355-18), 2018-07-23

**A**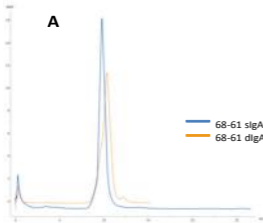**B**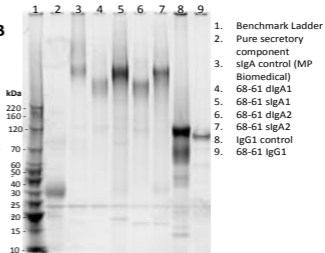

Supplement: IAI.00355-18_zii999092505s2.pdf [file IAI.00355-18_zii999092505s2.pdf]
